# Supplementary material for: Population pharmacokinetics and pharmacogenomics of tacrolimus in Chinese children receiving a liver transplant: initial dose recommendation
Source: PubMed Central journal article supplement — Transl Pediatr. 2020 Oct;9(5):576–86. doi: 10.21037/tp-20-84 (PMC7658763; doi:10.21037/tp-20-84), 2020-10
Supplement: tp-09-05-576-dss.pdf [file tp-09-05-576-dss.pdf]

## Data Sharing Statement

|                     |                                                                                                                                                    |                                                                                                                  |
|---------------------|----------------------------------------------------------------------------------------------------------------------------------------------------|------------------------------------------------------------------------------------------------------------------|
| <b>Article Info</b> | Available at <a href="http://dx.doi.org/10.21037/tp-20-84">http://dx.doi.org/10.21037/tp-20-84</a> .                                               |                                                                                                                  |
| <b>Item</b>         | <b>Question</b>                                                                                                                                    | <b>Authors' Response</b><br>(place "-" if not applicable)                                                        |
| 1                   | Would you like to share data collected for your study to others?                                                                                   | Yes                                                                                                              |
| 2                   | If not, would you like to share the reason for your decision?                                                                                      | -                                                                                                                |
| 3                   | What data in particular will be shared?                                                                                                            | The tacrolimus concentration data in particular will be shared.                                                  |
| 4                   | Any other documents will be share? Such as study protocol, statistical analysis plan, informed consent form, clinical study report, analytic code. | Statistical analysis plan, analytic code will also be shared if requested.                                       |
| 5                   | When will data availability begin?                                                                                                                 | From the publication date.                                                                                       |
| 6                   | When will data availability end?                                                                                                                   | Two years within the publication date.                                                                           |
| 7                   | To whom will you share the data?                                                                                                                   | Pediatric clinical pharmacist                                                                                    |
| 8                   | For what type of analysis or purpose?                                                                                                              | Study in tacrolimus population pharmacokinetics in children.                                                     |
| 9                   | How or where can the data/documents be obtained?                                                                                                   | Emails could be sent to the address below to obtain the shared data:<br>zpli@fudan.edu.cn.                       |
| 10                  | Any other restrictions?                                                                                                                            | We may balance the potential benefits and risks for each request and then provide the data that could be shared. |
